# Supplementary material for: Structure of bovine β-lactoglobulin–lactoferrin coacervates
Source: Royal Society of Chemistry journal article supplement (doi:10.1039/c4sm01333f), 2014-07-10
Supplement: c4sm01333f1.pdf [file c4sm01333f1.pdf]

## Supplemental Information

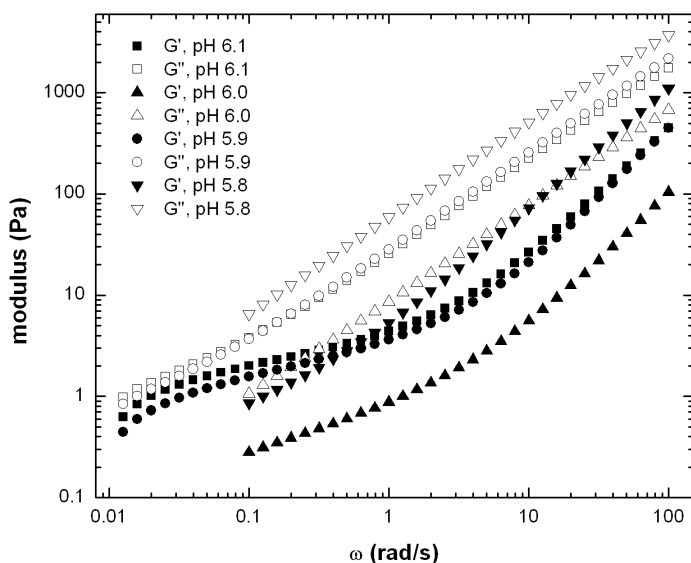

**Figure S1:** Dynamic oscillatory frequency sweeps at 5% strain ( $G'$ : closed and  $G''$ : open symbols) for coacervates prepared at four different mixing pH's. Triangles: pH 6.0, inverted triangles: pH 5.8, circles: pH 5.9 and squares: pH 6.1.

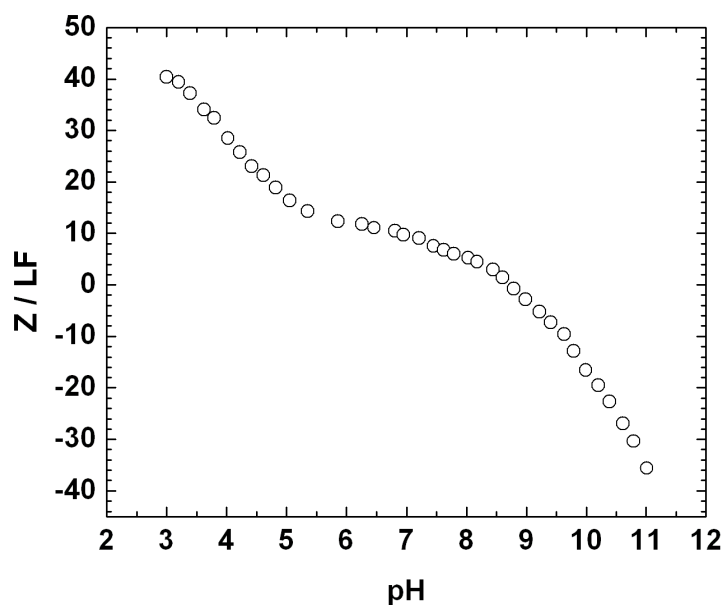

**Figure S2:** Potentiometric titration of bovine lactoferrin (LF) at room temperature (ca. 25°C) with no added salt. [LF] = 20.8 g/L, total volume = 10mL. Charge curve is the result of a high-to-low titration from isoionic pH using 0.1N HCl, and a low-to-high titration, starting from the same pH, using 0.1N NaOH.
